# Supplementary material
Source: Springer Nature journal article supplement (https://www.springermedizin.de/resource/supplementary/12885_2011_3742_MOESM1_ESM.pdf/9464308)

# Steps of Data Analyses

**1. FCDS:**  
Pancreatic cancer data  
(Patient level)

**2. US Census:**  
Population and area-  
based SES  
(Block groups)

Stratified by Age and Race

**3. Aggregated at  
Block group level**

**4. Area-based  
measures  
(Block groups)**

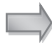

**5. *SaTScan***  
(Block groups)

**6. Pancreatic cancer:  
to identify expected or higher  
than expected block groups**

**7. Logistic regression  
analyses  
(Block groups)**

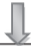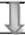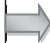

Supplement: MOESM1 [file 9464308]
